# Supplementary material
Source: HighWire-hosted journal article supplement (doi:10.1101/rna.077487.120)
Supplement: Supplemental_Figures_.pdf [file Supplemental_Figures_.pdf]

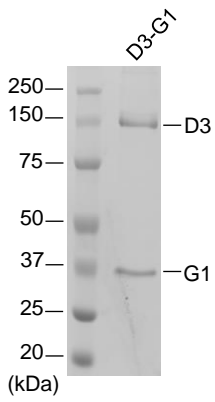

**Supplemental Figure 2.** Purified D3-G1 complex on SDS-PAGE.

Pri-mir-146a\_G

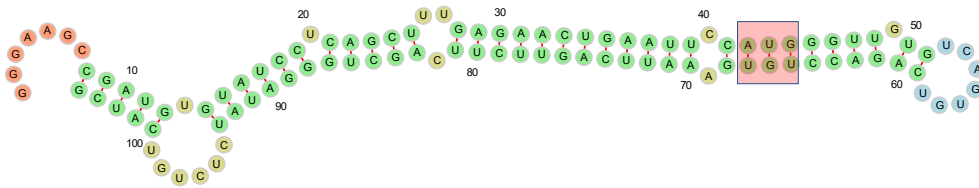

Pri-mir-146a\_C

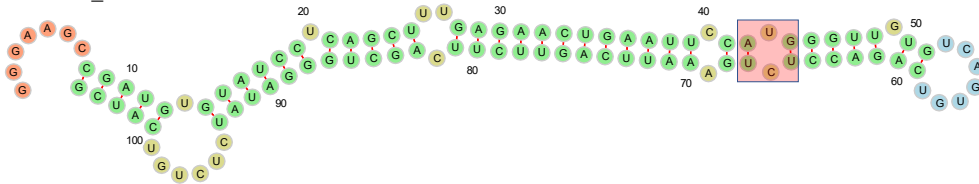

**Supplemental Figure 3.** Folded structure of pri-mir-146a\_G and C obtained using RNAfold (Lorenz et al., 2011).

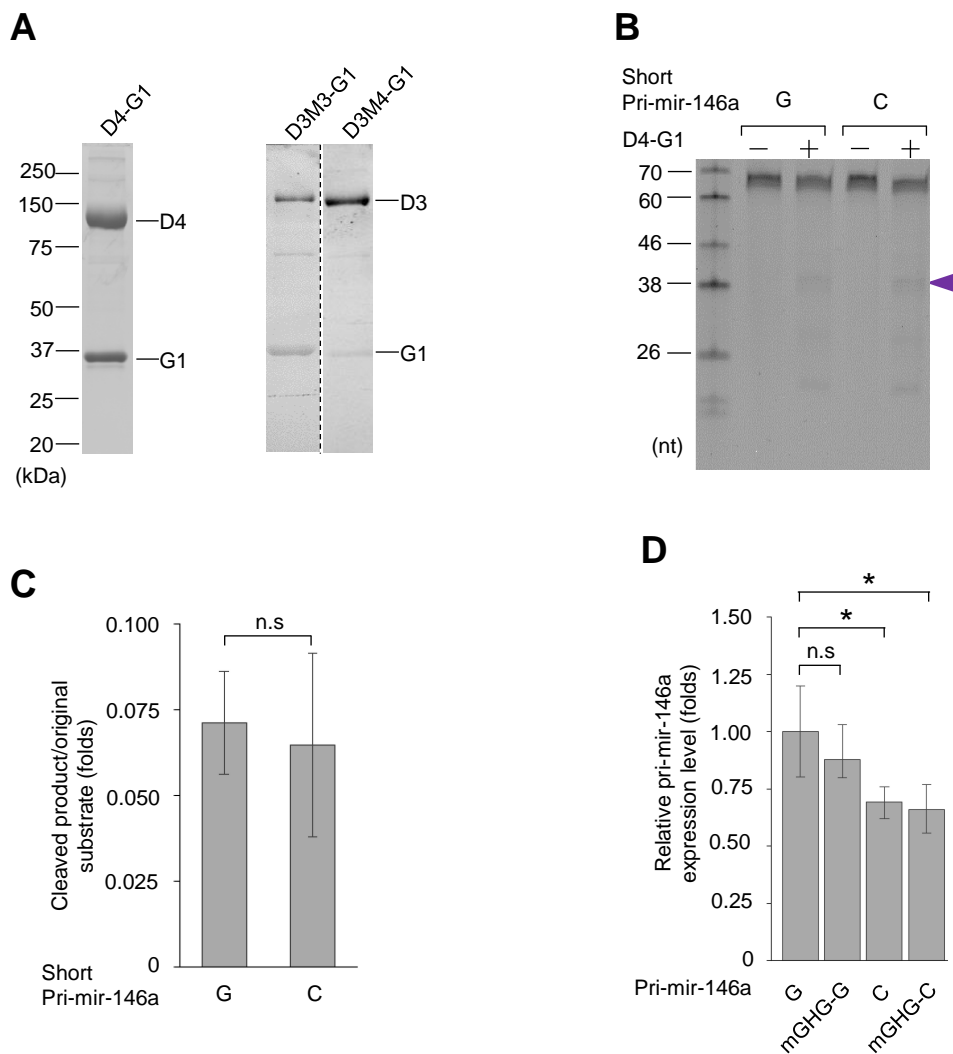

**Supplemental Figure 4.** The purified mutant D3-G1 complexes and their pri-mir-146a processing

(A) Purified D4-G1, D3M3-G1 and D3M4-G1 complexes on SDS-PAGE.

(B) The cleavage of short pri-mir-146a<sub>G</sub> and C by the D4-G1 complex, respectively. One pmol of each substrate was incubated with 30 pmol of D4-G1 in 10  $\mu$ L processing buffer.

(C) The cleavage efficiency of the D4-G1 complex in (B) was accessed from three independent experiments. Statistically significant and nonsignificant differences between two data sets were indicated by the asterisk (\*) and (n.s), respectively (two-tailed *t*-test).

(D) The qPCR-estimated pri-mir-146a levels from the experiments described in Figure 4C. Statistically significant and nonsignificant differences between the various data sets were indicated by an asterisk (\*) and n.s., respectively (two-tailed *t*-test; relative pri-mir-146a expression level of pcDNA3-pri-mir-146a<sub>G</sub> vs. pcDNA3-pri-mir-146a<sub>C</sub>:  $p = 0.017$ ; pcDNA3-pri-mir-146a<sub>G</sub> vs. pcDNA3-pri-mir-146a<sub>mGHG-G</sub>:  $p = 0.032$ ).
